# Supplementary material
Source: PubMed Central journal article supplement (PMC8137138)
Supplement: NIHMS1696600-supplement-Supplementary_Figures.pdf [file NIHMS1696600-supplement-Supplementary_Figures.pdf]

## Supporting Information

**Pharmaceutically acceptable carboxylic acid-terminated polymers show activity and selectivity against HSV-1 and HSV-2 and synergy with antiviral drugs**

**Tejabhiram Yadavalli<sup>1</sup>, Sudipta Mallick<sup>2</sup>, Pratikkumar Patel<sup>2</sup>, Raghuram Koganti<sup>1</sup>, Deepak Shukla<sup>1,3\*</sup>, Abhijit A. Date<sup>2\*</sup>**

<sup>1</sup> Department of Ophthalmology and Visual Sciences, University of Illinois at Chicago, Chicago, IL 60612, USA

<sup>2</sup> Department of Pharmaceutical Sciences, The Daniel K. Inouye College of Pharmacy, University of Hawaii Hilo, Hilo, HI 96720, USA

<sup>3</sup> Department of Microbiology and Immunology, University of Illinois at Chicago, Chicago, IL 60612, USA; Department of Bioengineering, University of Illinois at Chicago, Chicago, IL 60607, USA.

\* Corresponding Authors, [dshukla@uic.edu](mailto:dshukla@uic.edu), [dateabhi@hawaii.edu](mailto:dateabhi@hawaii.edu)

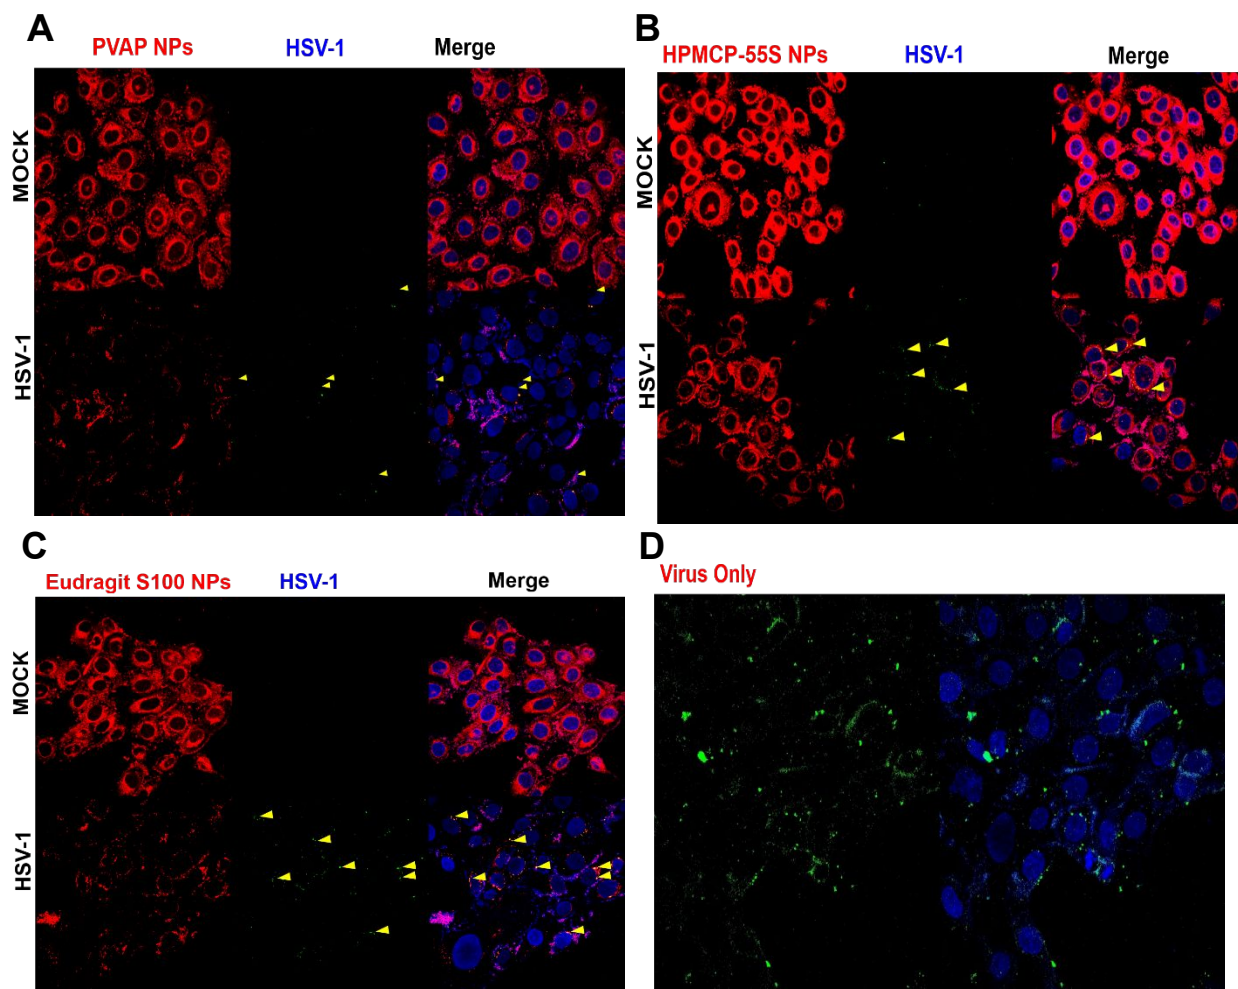

**Figure S1: Understanding the interaction between fluorescent polycarboxylate nanoparticles and fluorescent HSV-1 in the presence of HCE cells.** Polycarboxylate nanoparticles were labelled with fluorophore (Rhodamine-6G). HCE cells were seeded in an 8-chamber confocal microscopy slide (Nunc Lab-Tek, Thermo Fisher Scientific, Waltham, MA, USA) with 200  $\mu$ L of complete MEM media. At 24 h post seeding, 10  $\mu$ L of Rhodamine-6G labeled (A) PVAP (B) Eudragit S100 or (C) HPMCP-55S nanoparticles were either mixed with K26-GFP HSV-1 virus or mock control before they were added into each chamber of the 8-chamber plate. (D) Cells were also treated with only K26-GFP HSV-1 virus. After 2 h incubation, cells were fixed using 4% paraformaldehyde for 10 minutes. Nuc-blue™ (Thermo Fisher Scientific) DAPI stain was added to each well (2 drops per mL of solution) for 5 min before the images were procured using a confocal microscope. Images were taken at 488-505 nm for GFP virus and 525-581 nm for Rhodamine-6G. The cytoplasm of HCE cells treated with Rhodamine-6G labeled polycarboxylate nanoparticles (mock control) showed bright red fluorescent indicating extensive uptake by HCE cells. The HCE cells treated with Rhodamine-6G labelled nanoparticles and K26-GFP HSV-1 significantly lesser intracellular fluorescence indicating interaction between polymeric nanoparticles and HSV-1. The yellow arrows indicate the presence of neutralized virus particles present inside the cell.

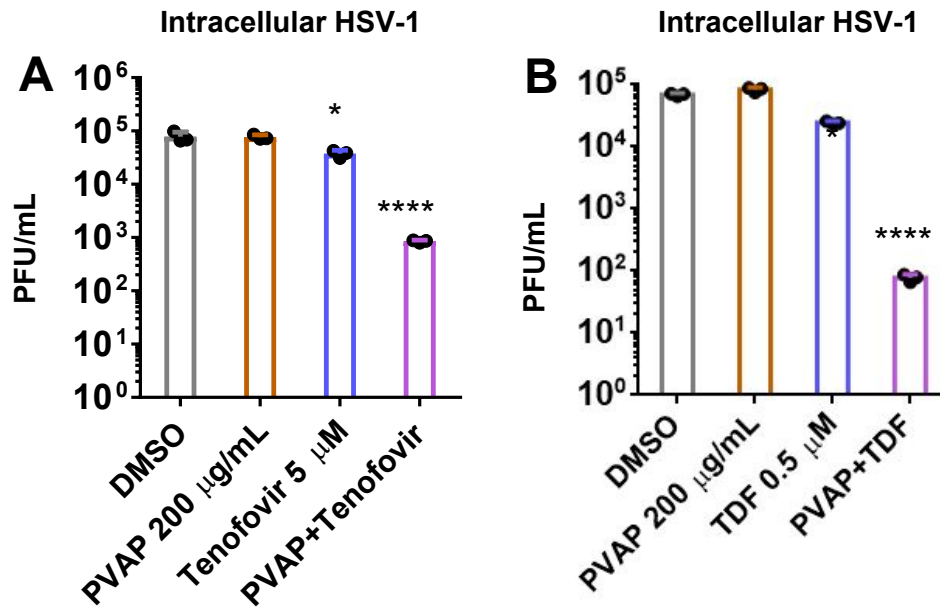

**Figure S2: PVAP nanoparticles and tenofovir or tenofovir disoproxil fumarate show synergistic therapeutic activity against HSV-1 in vitro.** HCEs were infected with 0.1 MOI HSV01 17 GFP and then therapeutically treated with either 200  $\mu$ g/mL PVAP nanoparticles and Tenofovir (5  $\mu$ M) individually or in combination, (A) Whole cell lysates were titrated for viral load using plaque assays. (B) In a similar experiment 200  $\mu$ g/mL PVAP nanoparticles was synergized with TDF (0.625  $\mu$ M) and tested on HSV-1 infected HCE cells. Asterisks indicate significance by multiple Students T-test : \* $p$ <0.05, \*\*\*\* $p$ <0.0001.

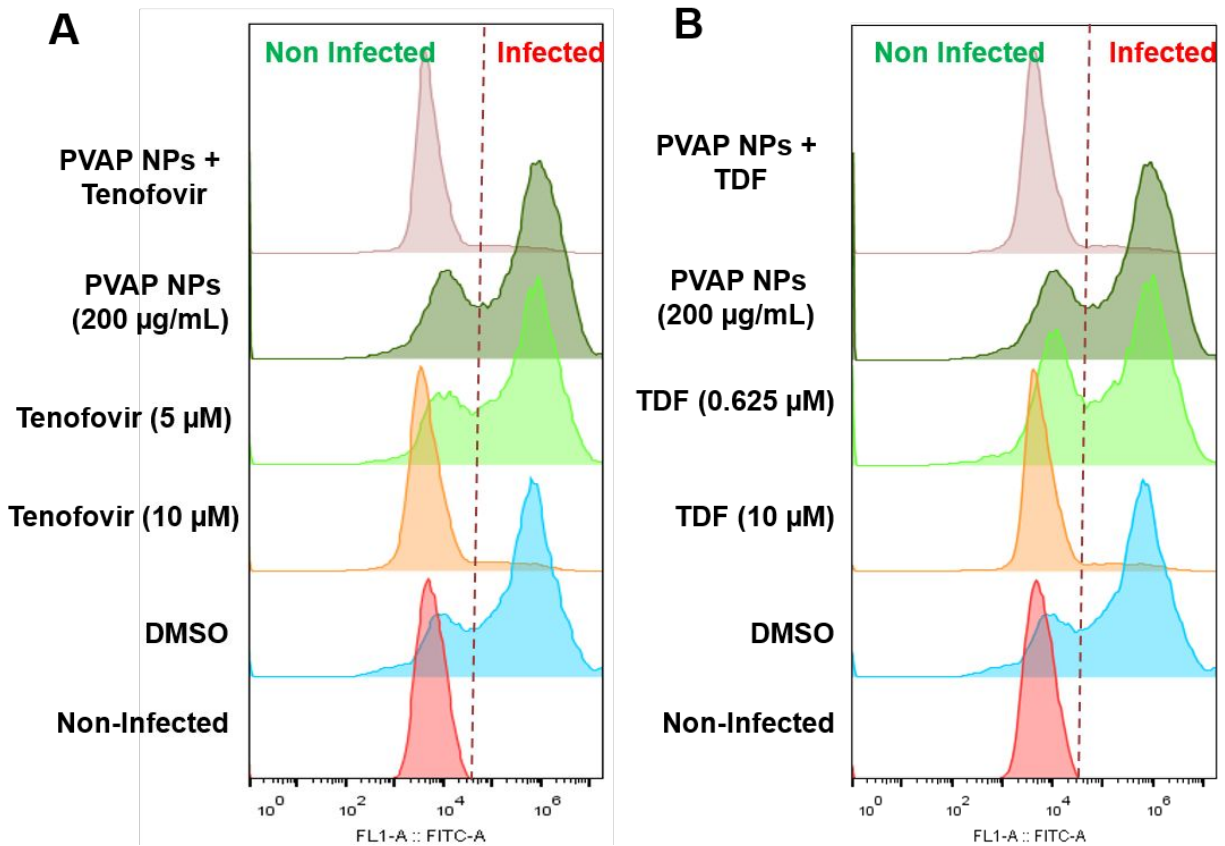

**Figure S3: PVAP nanoparticles (NPs) and tenofovir or tenofovir disoproxil fumarate (TDF) show synergistic therapeutic activity against HSV-2 in vitro.** (A) HeLa cells were infected with HSV-2 333 GFP virus at 0.1 MOI. At 2 hpi, cells were washed with PBS once and fresh media containing an ineffective concentration of PVAP NPs (200 µg/mL), ineffective concentration of tenofovir (5 µM), effective concentration of tenofovir (10 µM) and combination of ineffective concentration of PVAP NPs (200 µg/mL) and tenofovir (5 µM). The efficacy was evaluated qualitatively using flow cytometry analysis and the data was compiled using FlowJo Version 10.0. A no-infection, no-treatment control was used as fluorescence baseline for the experiments. (B) A similar experiment was performed using TDF instead of tenofovir at shown concentrations.
